# Supplementary material
Source: Copernicus journal article supplement (doi:10.5194/egusphere-2026-1628)
Supplement: Supplementary file 1 [file egusphere-2026-1628-supplement.pdf]

# High Frequency of Urban New Particle Formation on the Tibetan Plateau: Quantifying Formation Rates, Growth Rates, and CCN Production

Qiqi Mo<sup>1</sup>, Longjie Wen<sup>1,2</sup>, Gang Zhao<sup>1,3\*</sup>, Chunxiang Ye<sup>4\*</sup>, Jie Sun<sup>1</sup>, Weili Lin<sup>1,5</sup>, Fengjun Shen<sup>1</sup>, Tong Liu<sup>1</sup>, Yicheng Gao<sup>1</sup>, Yi Chen<sup>4</sup>, Tiantian Zhang<sup>1</sup>, Tong Zhu<sup>4</sup>

<sup>1</sup>Key Laboratory of Ecology and Environment in Minority Areas, Minzu University of China, National Ethnic Affairs Commission, Beijing 100081, China

<sup>2</sup>School of Ecology and Environment, College of Intelligence, Harbin Institute of Technology (Shenzhen), Shenzhen, 518055, China

<sup>3</sup>Key Laboratory of Biodiversity and Environment on the Qinghai-Tibet Plateau, Ministry of Education, Xizang University, Lhasa 850000, China

<sup>4</sup>SKL-ESPC & SEPKL-AERM, College of Environmental Sciences and Engineering, Institute of Tibetan Plateau, and Center for Environment and Health, Peking University, Beijing, China

<sup>5</sup>Institute of National Security, Minzu University of China, Beijing, 100081, China

*Correspondence to:* Gang Zhao ([gangz@muc.edu.cn](mailto:gangz@muc.edu.cn)) and Chunxiang Ye ([c.ye@pku.edu.cn](mailto:c.ye@pku.edu.cn))

Figure S1 to Figure S6

Class I day

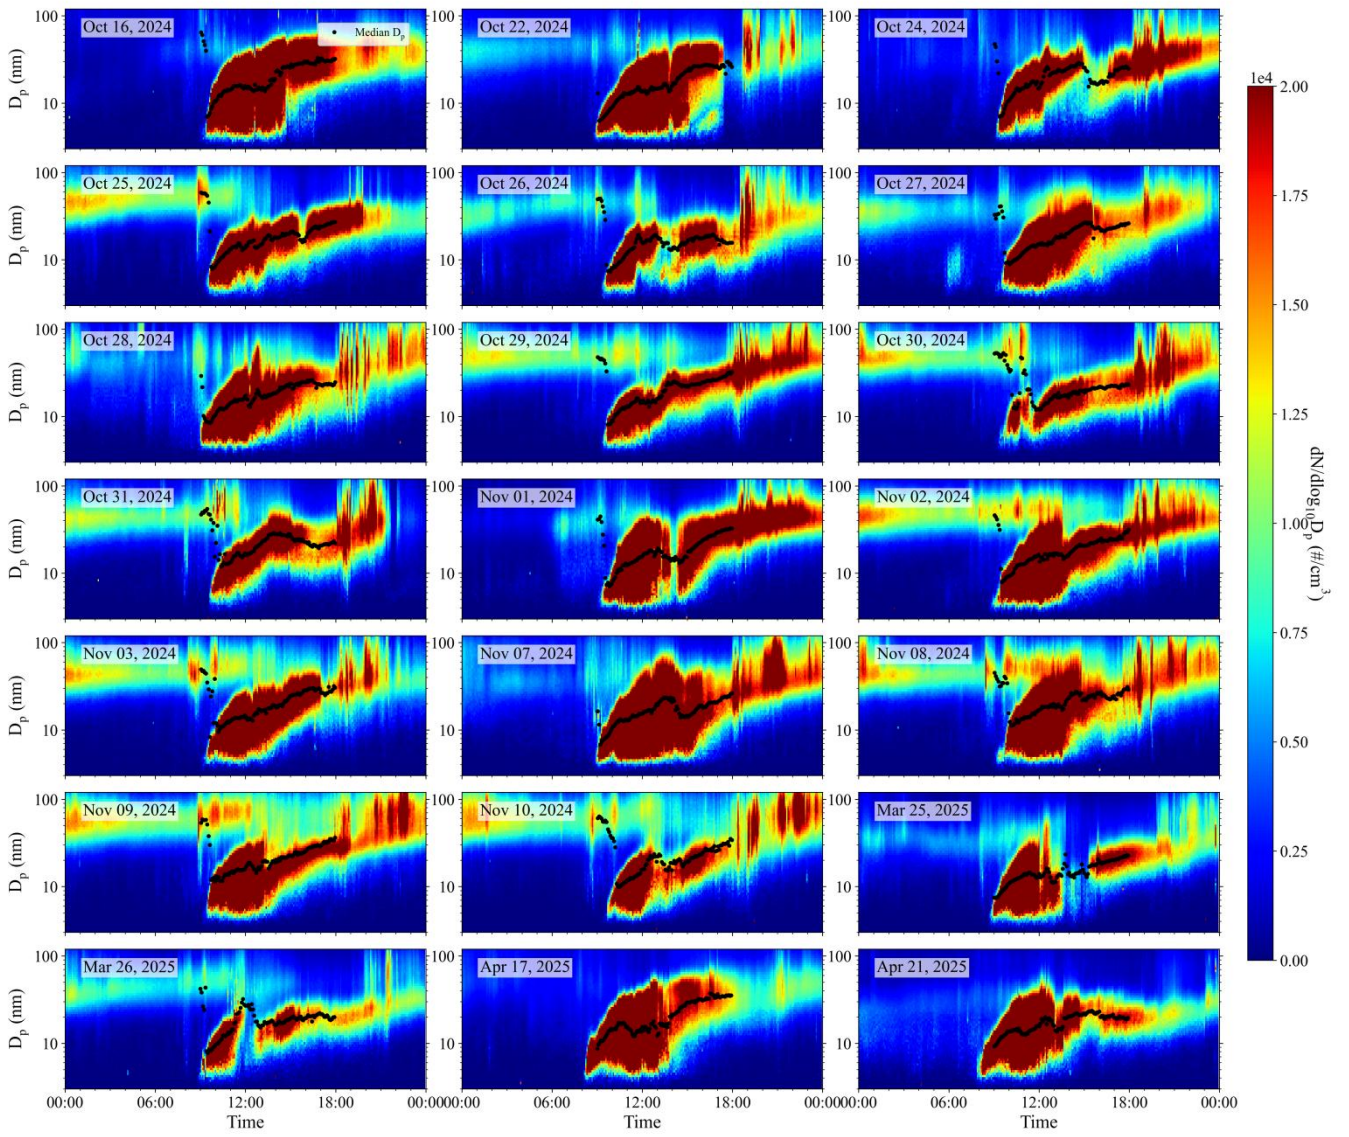

**Figure S1:** PNSDs for all Class I days. Each panel represents one day. The black dots indicate the median particle diameter.

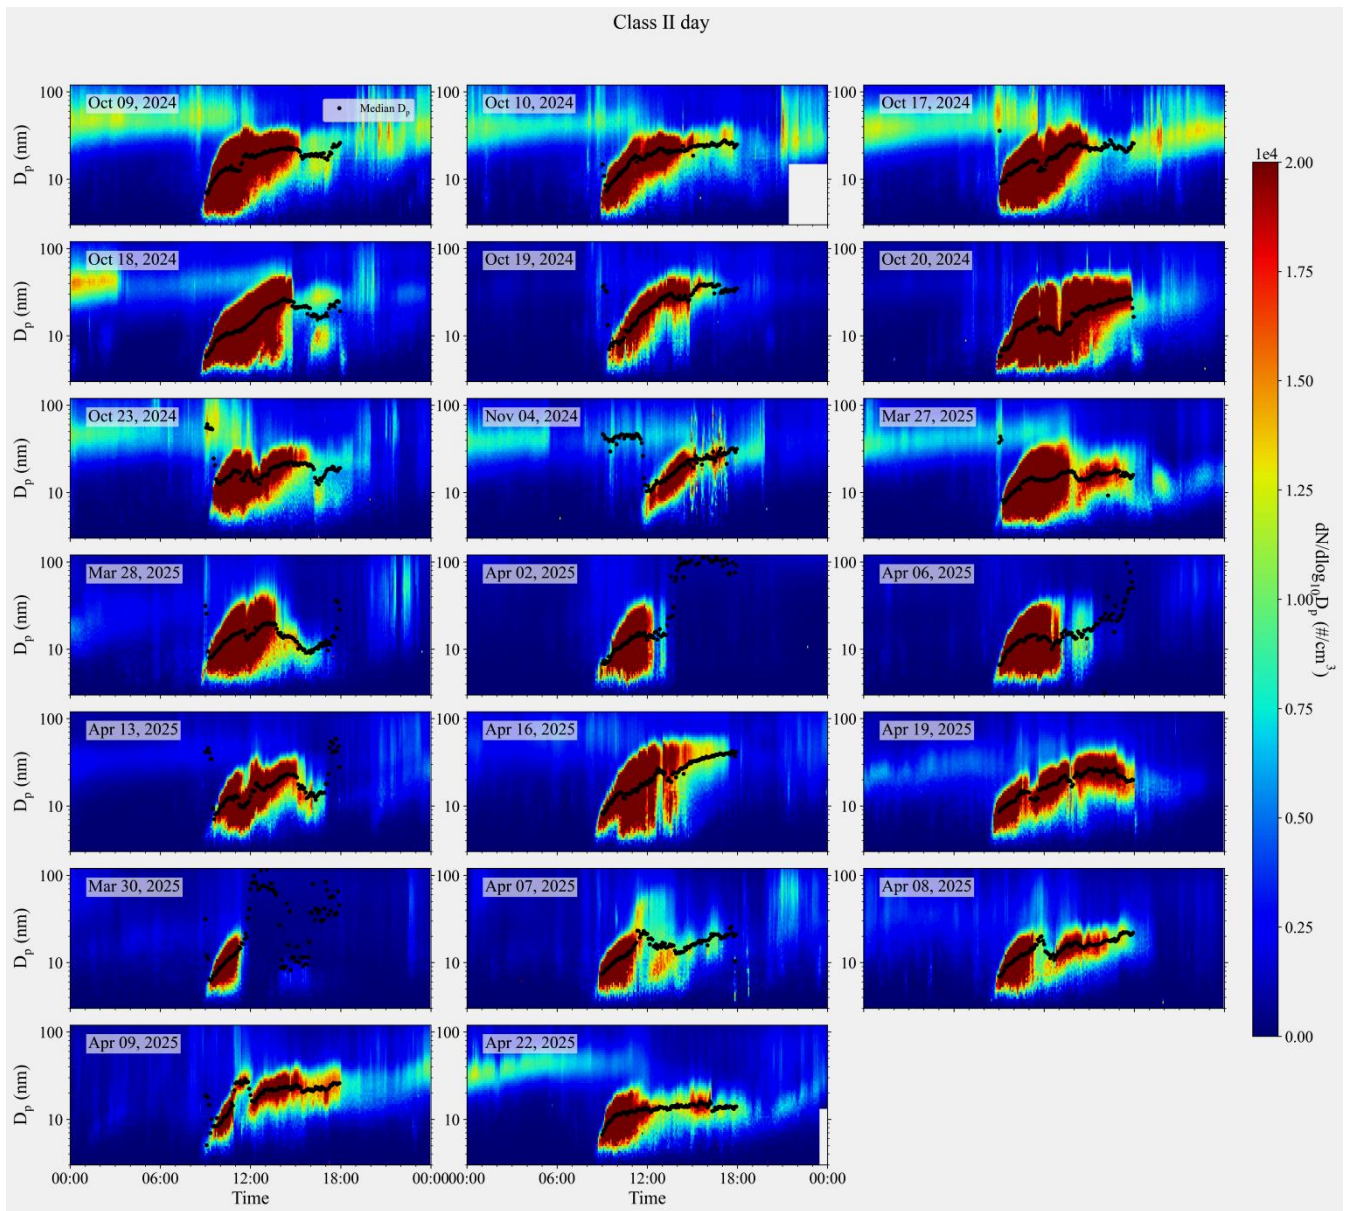

**Figure S2:** PNSDs for all Class II days. Each panel represents one day. The black dots indicate the median particle diameter.

Undefined day

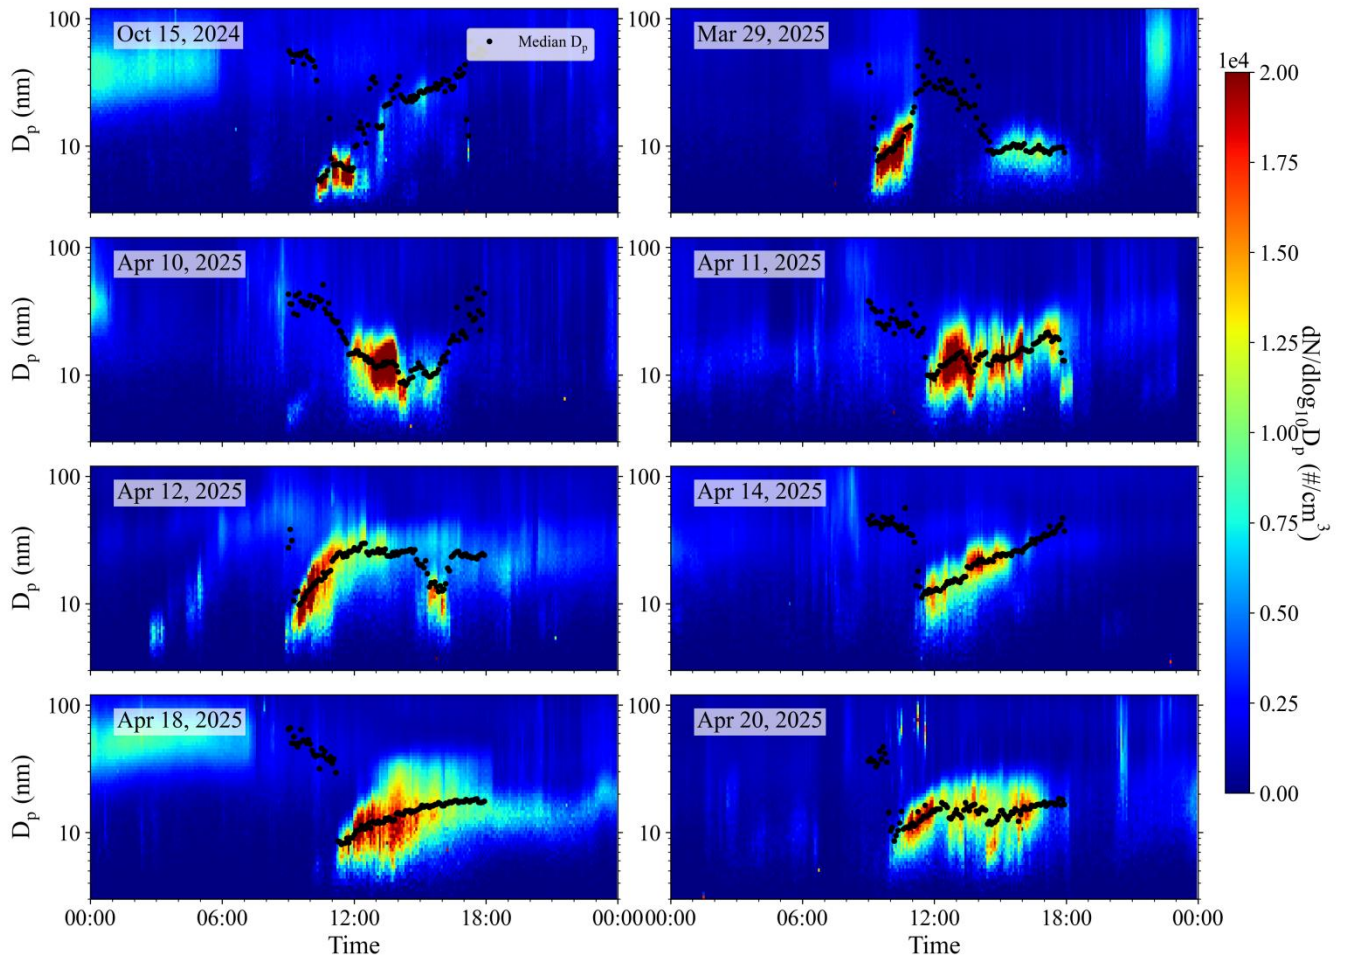

**Figure S3:** PNSDs for all Undefined days. Each panel represents one day. The black dots indicate the median particle diameter.

### Non-Event day

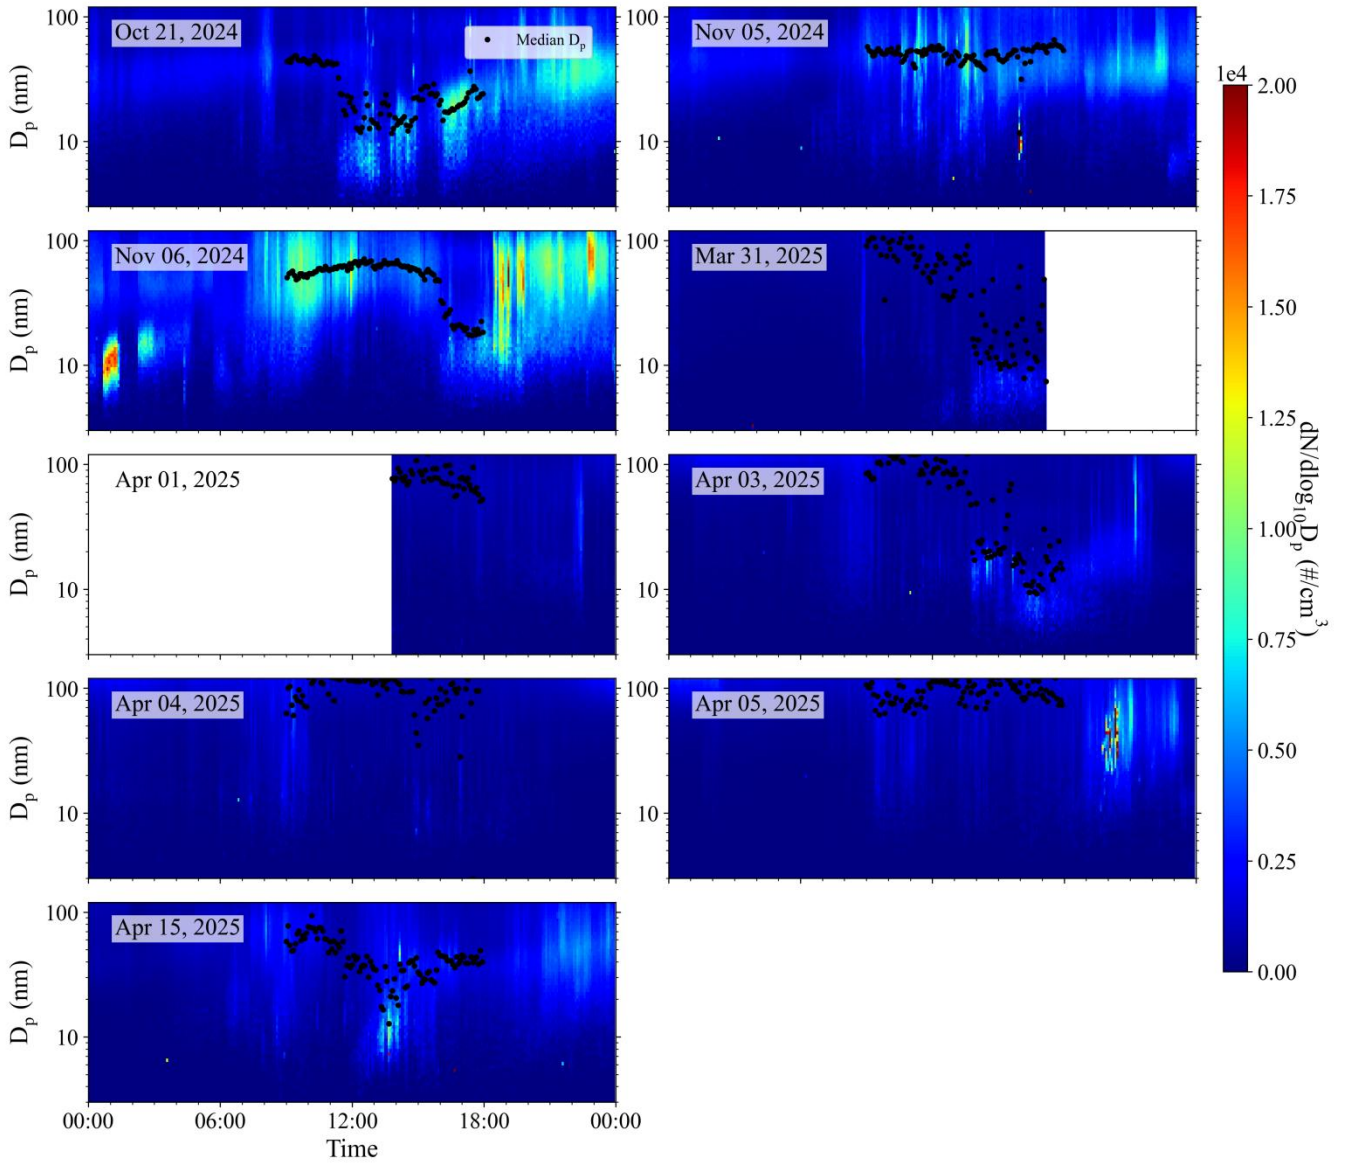

**Figure S4:** PNSDs for all Non-Event days. Each panel represents one day. The black dots indicate the median particle diameter.

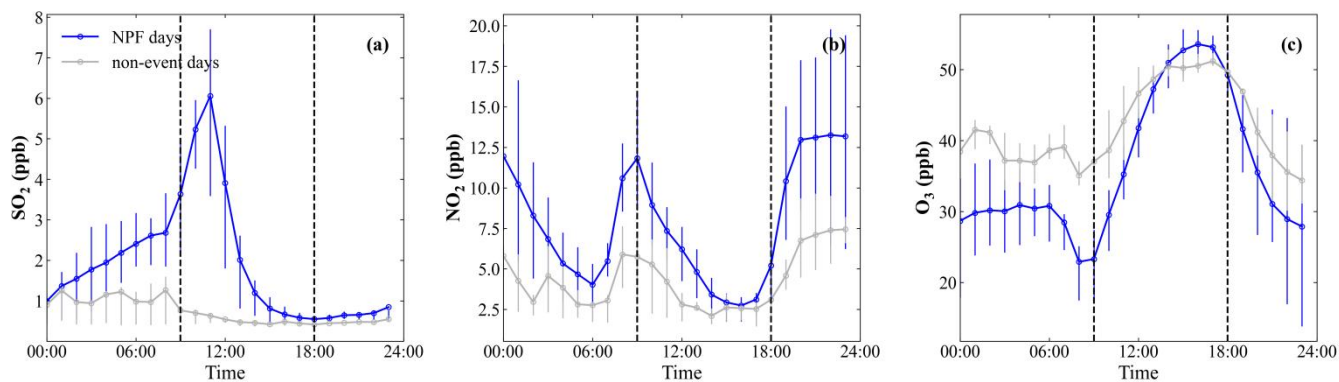

**Figure S5:** Diurnal variations of (a) SO<sub>2</sub>, (b) NO<sub>2</sub>, and (c) O<sub>3</sub> during the monsoon period on NPF days and non-NPF days. The upper and lower bars indicate the 75th and 25th percentiles, respectively, and the markers represent the average values.

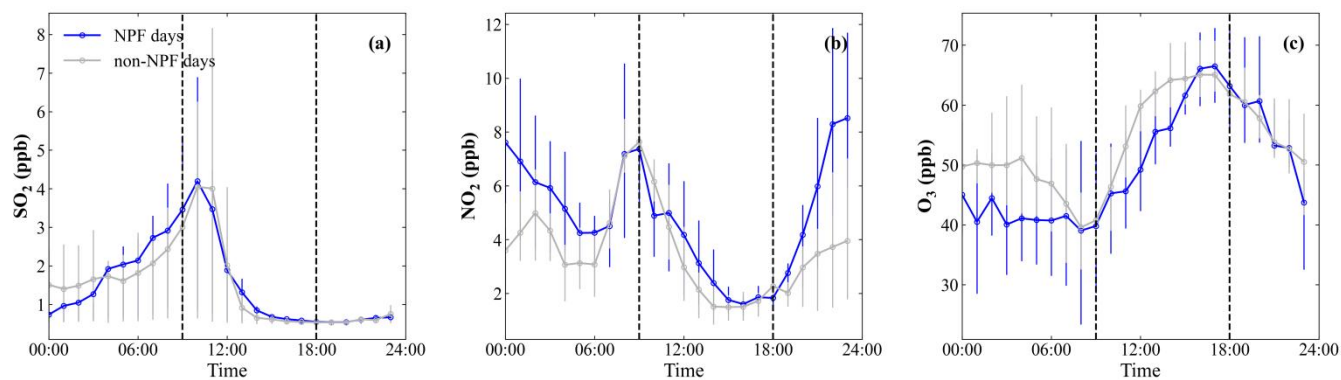

**Figure S6:** Diurnal variations of (a) SO<sub>2</sub>, (b) NO<sub>2</sub>, and (c) O<sub>3</sub> during the pre-monsoon period on NPF days and non-NPF days. The upper and lower bars indicate the 75th and 25th percentiles, respectively, and the markers represent the average values.
